1  
2  
3  
4  
5  
6  
7  
8  
9  
10  
11  
12  
13  
14  
15  
16  
17  
18  
19  
20  
21  
22  
23  
24  
25  
26  
27

Proximate Predictors of Variation in Egg Rejection Behavior by Hosts of Avian Brood Parasites

Mikus Abolins-Abols and Mark E. Hauber

Author Note

Mikus Abolins-Abols, Department of Evolution, Ecology, and Behavior, School of Integrative Biology,  
University of Illinois, Urbana-Champaign, IL 61801, USA

Mark Hauber, Department of Evolution, Ecology, and Behavior, School of Integrative Biology, University  
of Illinois, Urbana-Champaign, IL 61801, USA

Correspondence should be addressed to Mikus Abolins-Abols, [m.abolins.abols@gmail.com](mailto:m.abolins.abols@gmail.com)

Funding for this project was provided by the Harley Jones Van Cleave Professorship to MEH. We thank  
private landowners for their permission to work on their properties.

Ethical approval: All applicable national and institutional guidelines for the care and use of animals were  
followed. All procedures were approved by the University of Illinois IACUC (protocol #17259) and state  
and federal agencies.

28  
29  
30  
31  
32  
33  
34  
35  
36  
37  
38  
39  
40  
41  
42  
43  
44  
45  
46  
47  
48  
49

## Abstract

The rejection of parasitic eggs by hosts of avian brood parasites is one of the most common and effective defenses against parasitism. Despite its adaptive significance, egg rejection often shows substantial intraspecific variation: some individuals are more likely to remove or abandon parasitic eggs than others. Understanding variation in egg rejection requires that we study factors linked to both the ability to perceive parasitic eggs, as well as factors that may influence the rejection of a foreign egg once it has been recognized. Here we asked what cognitive, physiological, and life-history factors explained variation in the rejection of model eggs by American Robin *Turdus migratorius* females. We found that the probability of egg rejection was related to the clutch size at the time of parasitism: in support of Weber's law, females with fewer eggs were more likely to reject the model eggs. In turn, females with greater mass and higher corticosterone levels were less likely to reject eggs, and egg rejection probability was negatively related to incubation progress. Our data thus suggest that proximate predictors of an individual's egg rejection behavior include components of the nest's perceptual environment, life-history factors, as well as the physiological state of the animal. However, much of the variation in the responses of robins to the model eggs remained unexplained. Future experiments should aim to understand the causal roles of these and other factors in generating within- and among-individual variation in the rejection of parasitic eggs.

**Keywords:** brood parasitism; Brown-headed Cowbird, corticosterone; egg rejection; host defenses, American Robin

50

## Introduction

51 In obligate avian brood parasitic systems, parasites lay their eggs in the nests of host species,  
52 often causing a substantial reproductive loss to the affected hosts (Davies, 2000; Feeney,  
53 Welbergen, & Langmore, 2014; Soler, 2017). Many hosts have evolved a variety of adaptations  
54 that allow them to mitigate or overcome the negative fitness effects of brood parasitism. One of  
55 the most effective defenses against parasitism is the rejection of foreign eggs from the nest  
56 (Davies & Brooke, 1988; Moksnes & Røskoft, 1992; Rothstein, 1982). Decades of research  
57 have demonstrated that some hosts can recognize parasitic eggs using a variety of cognitive  
58 rules, which include memory-based templates as well as direct comparisons of egg colors  
59 (reviewed by Manna, Moskát, & Hauber, 2017). Brood parasites, on the other hand, have  
60 evolved to overcome these defenses by laying mimetic (Davies & Brooke, 1988) or cryptic  
61 (Langmore, Stevens, Maurer, & Kilner, 2009) eggs that limit the ability of hosts to recognize and  
62 reject the parasitic eggs (Davies, Brooke, & Kacelnik, 1996; Feeney, Welbergen, & Langmore,  
63 2012; Moskát & Hauber, 2007).

64 Variation in the host visual systems, morphology, and coevolutionary history with brood  
65 parasites has led to divergent abilities of host species to recognize and reject parasitic eggs  
66 (Avilés, 2008; Peer & Sealy, 2004; Rothstein, 1975; Stoddard & Stevens, 2011). Importantly,  
67 however, differences in the egg rejection behavior exist not only among, but also within species  
68 (Croston & Hauber, 2014a; Grim, Samaš, & Hauber, 2014; Molina-Morales et al., 2014; Samaš,  
69 Hauber, Cassey, & Grim, 2011). While some of the intraspecific variation in egg rejection is  
70 linked to the variation in the degree of mimicry of the parasitic egg in a particular clutch (Abolins-  
71 Abols, Hanley, Moskát, Grim, & Hauber, 2019; Moskát et al., 2014), host individuals  
72 nevertheless often show variation in the response to the *same* foreign egg stimuli (Grim et al.,  
73 2014; Luro & Hauber, 2017). From a mechanistic standpoint, differences in responses to the  
74 same parasitic stimuli could be caused by differences in the ability of hosts to perceive the

75 parasitic egg stimulus, or differences in the probability of rejection once the parasitic egg has  
76 been recognized.

77         Differences in the ability to perceive and identify a parasitic egg as non-self may be  
78 driven either by individual variation in sensory systems (Stoddard & Stevens, 2011) or variation  
79 of the perceptual environment of the parasitized nest (Honza, Procházka, Morongová, Čapek, &  
80 Jelínek, 2011). For example, some hosts use the range and distribution of egg colors and  
81 patterns in the nest to make rejection decisions (Bán, Moskát, Barta, & Hauber, 2013; Moskát,  
82 Avilés, Bán, Hargitai, & Zölei, 2008). The variation of egg color in a clutch may be driven by the  
83 extent of the host's intraclutch variability (Moskát et al., 2008) or differences in the parasite-to-  
84 host egg ratio, due to single vs. multiple parasitism and/or variation in host clutch size (Manna et  
85 al., 2019; Moskát et al., 2009; Stevens, Troscianko, & Spottiswoode, 2013, but see Lang,  
86 Bollinger, & Peer, 2014). Hosts may respond differently to nests with varying parasite-to-host  
87 egg ratio not only because of the variation in color, but also because of the Weber's law, which  
88 posits that the ability of animals to discriminate between stimuli depends on the stimulus  
89 proportionality (Stevens, 1975). Weber's law states that, when the proportional change in a  
90 stimulus is low (e.g. a single parasitic egg added to a large clutch), the ability of individuals to  
91 detect that change is lower relative to situations when the proportional change is larger (e.g. a  
92 single parasitic egg in a small clutch). The ability of hosts to recognize brood parasitism may  
93 thus depend on the size of the host clutch (Akre & Johnsen, 2014).

94         The probability of parasitic egg rejection may depend not only on the variation in the  
95 host's ability to perceive the parasitic egg, but also on factors that affect the likelihood of egg  
96 rejection *after* sensory and cognitive processes have processed the parasitic egg stimulus. For  
97 example, hosts are more likely to reject foreign eggs of the same phenotype following a prior  
98 experience with brood parasitism (Hauber, Moskát, & Bán, 2006) or earlier in the incubation  
99 stage (Moskát & Hauber, 2007). Such experience- and life history-dependent plasticity in  
100 parasitic egg rejection reflects the complexity of the changing costs associated with brood

101 parasitic egg rejection in relation to host fitness (Avilés, 2018; Hauber et al., 2014; Molina-  
102 Morales et al., 2014). For example, a brood parasitic chick hatched from an egg laid in the host  
103 nest prior to the onset of incubation is more likely to negatively affect host fitness than a  
104 parasitic chick hatched from an egg laid late in incubation (Moskát, 2005). Variation in the  
105 likelihood of egg rejection across different life history stages may in turn be linked to changes in  
106 the physiological state of the host (Abolins-Abols & Hauber, 2018): for instance, hormones that  
107 affect maternal motivation and attachment in females (Bridges, 2015; Richard-Yris, Leboucher,  
108 Chadwick, & Garnier, 1987) may cause changes in the readiness of hosts to accept or reject  
109 any eggs in the nest (Abolins-Abols & Hauber, 2018). Specifically, corticosterone, a  
110 glucocorticoid hormone that is involved in the regulation of the stress-response and metabolism  
111 (MacDougall-Shackleton, Bonier, Romero, & Moore, 2019; Romero & Butler, 2007) can  
112 suppress maternal behavior (Horton & Holberton, 2009). Importantly, corticosterone has been  
113 shown to increase in hosts when they are exposed to brood parasitism (Mark & Rubenstein,  
114 2013; Ruiz-Raya et al., 2018), suggesting that it may affect the likelihood of parasitic egg  
115 rejection by hosts (Abolins-Abols & Hauber, 2018). In addition to context-specific, plastic  
116 differences in egg rejection, hormones may also explain stable and repeatable individual  
117 variation (i.e., personalities) in egg rejection irrespective of the context (Avilés & Parejo, 2011).  
118 Indeed, in many cases hosts show repeatable individual variation in parasitic egg rejection  
119 (Croston & Hauber, 2014a; Samaš et al., 2011) often across different contexts (Grim et al.,  
120 2014). Importantly, hormonal levels also often show consistent differences between individuals  
121 (Baugh et al., 2017; Rensel & Schoech, 2011; Romero & Reed, 2008), suggesting that  
122 individual differences in egg rejection may be hormonally mediated (Abolins-Abols & Hauber,  
123 2018).

124 In this study, we took a holistic approach and asked what cognitive, physiological, and  
125 life-history factors explained variation in the egg rejection behavior of American Robins  
126 (hereafter: robin), hosts to the obligate brood-parasitic Brown-headed Cowbird *Molothrus ater*

127 (hereafter: cowbird) in North America. Robins have served as a productive model system in  
128 which to investigate the perceptual mechanisms underlying parasitic egg rejection (e.g. Hanley  
129 et al., 2017). While only a minority of robin individuals accept naturally laid parasitic cowbird  
130 eggs (Rothstein, 1975, 1982), they show repeatable individual variation in the acceptance or  
131 rejection of model eggs (Croston & Hauber, 2014a; Luro & Hauber, 2017).

132 Psychophysical theory (Weber's law; Akre & Johnsen, 2014) and empirical data (Moskát  
133 et al., 2008) suggest that hosts should reject parasitic eggs more frequently when they have  
134 smaller clutches. We therefore asked whether the probability of rejection of model parasitic eggs  
135 by robins was explained by clutch size at the time of experimentation. We also tested if egg  
136 rejection was related to the life history context (Hauber et al., 2014) by assessing whether  
137 model egg rejection by robin hosts depended on female age, the progression of the breeding  
138 season, and incubation stage. We predicted that older, more experienced breeders may be  
139 more likely to reject model eggs (Moskát, Bán, & Hauber, 2014), that females would be more  
140 likely to accept model eggs added later in incubation (Alvarez, 1996; Moskát, 2005) and later in  
141 the breeding season (Thorogood & Davies, 2013). Finally, we asked if the probability of egg  
142 rejection depended on host internal state as assessed by baseline corticosterone levels and  
143 body mass, predicting that females with higher corticosterone levels (Abolins-Abols & Hauber,  
144 2018) and higher body mass (Peer & Sealy, 2004) would be more likely to reject model eggs.

145

146

## Method

147

### 148 Study Site and Species

149

150

151

152

All procedures were approved by the University of Illinois IACUC protocol #17259. We  
studied American Robin females at Wandell's Nursery, a deciduous tree farm near Urbana, IL,  
USA (lat: 40.128184; long: -88.105349), between April 26 and July 8, 2018. We surveyed the  
study area every 3 days to search for nests and monitor their status. We assumed a deposition

153 of one new egg per day during the laying period, and clutches with 2 or more consecutive days  
154 of constant egg numbers were deemed completed (Vanderhoff, Pyle, Patten, Sallabanks, &  
155 James, 2016). The median clutch size is 3 eggs in this population (mean: 3.38, range: 2-5).

156

## 157 **Capture and Sample Collection**

158 We captured female robins (n=52) using mist nets as close to the predicted clutch  
159 completion date as possible (range: 2 days before, 4 days after; median 1.5 days after  
160 completion). In bird species with female-only incubation, including the American Robin  
161 (Vanderhoff et al., 2016), the female is known to be the egg rejecter sex (Honza, Požgayová,  
162 Procházka, & Tkadlec, 2007; Palomino, Martín-vivaldi, Soler, & Soler, 1998). Subjects were  
163 captured between 6:00 am and 11:30 am using a 12 m long mist net (eye size 38 mm) that was  
164 bent around a middle pole, resulting in a V-shaped net around the focal female's nest. Robin  
165 females were either caught in the net while attempting to land in their nests, or, if the females  
166 avoided the net and started incubating, by flushing the incubating females into the net.

167 Upon capture, we collected a ~75  $\mu$ l blood sample from the brachial vein using a 26 G  
168 needle and heparinized capillary tubes. The mean start time of blood collection was 131 s after  
169 capture (range 70-220 s, standard deviation (SD) = 37.7). We typically ended blood collection at  
170 180 s (3 min) after capture if a sufficient blood volume was collected (i.e., the "3 minute rule" for  
171 baseline corticosterone analysis: Romero & Reed, 2005). If not, we continued to collect blood  
172 after the 3 min cutoff (mean: 200 s, range for ending blood collection 143-245 s, SD = 18.9; see  
173 below for the effect of the timing of blood collection on corticosterone levels). Blood was  
174 transferred to a centrifuge tube and stored on ice until centrifugation (3-9 hrs after collection).  
175 We centrifuged samples at 13,000 rpm for 10 min at 4 °C to separate plasma from blood cells,  
176 and stored the plasma samples at -80 °C until analysis.

177 After blood collection, we banded each bird with a USGS aluminum band as well as 3  
178 unique plastic color bands for individual identification in the field. We measured the mass of

179 birds to the nearest 0.5 g. We estimated the age of the females (second year or after second  
180 year) by comparing the coloration of the wing feathers according to published guidelines (Pyle,  
181 1997). Birds were then released at the site of capture (~10 min after capture), and the net was  
182 removed.

183 One day after the capture, we returned to the focal nest to confirm female identity and  
184 nest attendance by verifying the band colors. We found that 6 out of 52 (12 %) of females  
185 abandoned their nests overnight and 5 out of 52 (10%) nests were depredated overnight  
186 following the capture.

187

### 188 **Experimental Parasitism**

189 If the nest was still active on the day after capture, we placed a dark blue 3D-printed  
190 model cowbird egg in the nest (Figure 1). Our 3D-printed smooth nylon eggs (sourced  
191 commercially from Shapeways.com) resembled natural Brown-headed Cowbird eggs in size  
192 and weight (details given in Iqic et al., 2015). We painted the eggs with acrylic dark blue paint  
193 (Winsor & Newton Galeria Acrylic Ultramarine) applying three paint coats to each egg. The  
194 resulting reflectance spectra of the model eggs and those of natural robin eggs have been  
195 reported previously (Croston & Hauber, 2014b). We did not remove a robin egg from the nest as  
196 cowbirds do when they parasitize nests (Davies, 2000), because prior studies had suggested  
197 that *Turdus* thrushes respond to model parasitic eggs similarly, irrespectively of whether clutch  
198 size is maintained or increased as part of the experiment (Grim et al., 2011). We chose this  
199 artificial egg color type because cowbirds are natural brood parasites of robins (Rothstein, 1982)  
200 and because eggs of this color have been shown to be rejected at intermediate rates by robin  
201 females (Croston & Hauber, 2014b). Furthermore, differences in the propensity of rejection or  
202 acceptance of these eggs are significantly repeatable among robin individuals across multiple  
203 exposures within a breeding attempt (Luro & Hauber, 2017).



204           Following the addition of the model egg, we counted the number of natural robin eggs in  
205 the nest. We then returned and recorded the presence/absence of the blue egg on the next day,  
206 visiting the nest at the same time of day compared to when the model egg was added. Robins  
207 that reject dark blue model eggs nearly always do so on the first day after experimental  
208 parasitism (Croston & Hauber, 2014a), therefore we used the rejection at day 1 as our response  
209 variable. We found that a further 3 nests were abandoned and 4 depredated overnight following  
210 the experimental parasitism. Due to the abandonment and predation of nests, and because 3  
211 birds escaped during the initial processing, we had complete data on the rejection behavior of  
212 31 birds (60% of the initial captures).

213           Because our aim was to begin to explore correlates of individual variation in rejection  
214 behavior in response to a model egg of known intermediate rejection rate, we did not  
215 manipulate any of the factors that were predicted to explain variation in egg rejection. We also  
216 did not investigate the difference in the rejection rates of the dark blue model eggs in  
217 comparison with control model egg treatments, such as robin-mimetic or cowbird-mimetic  
218 colors: previous work had already shown these other egg colors to be consistently rejected or  
219 accepted, respectively, independent of the individual identity in robins (Croston & Hauber,  
220 2014b; Hanley et al., 2017; Igic et al., 2015). However, as an internal control, we checked on  
221 each of the robin's own eggs in the nest (i.e. their number and whether intact) throughout our  
222 monitoring period, and found none of these eggs to be missing or broken, indicating that robins  
223 responded specifically to the dark blue model eggs.

224

## 225 **Hormone Assays**

226           We used an enzyme immune assay to measure the circulating baseline corticosterone  
227 levels in blood samples from females caught before the experimental parasitism (Cayman  
228 Chemical, catalogue number 501320). Hormones were extracted from plasma using diethyl  
229 ether: 10  $\mu$ l plasma was suspended in 200  $\mu$ l double-distilled water and mixed with 1 ml diethyl

230 ether. The aqueous phase was flash-frozen, and the ether phase decanted. The extraction  
231 procedure was repeated 3 times, following which the ether was evaporated under a gentle  
232 stream of nitrogen using an in-house constructed evaporation manifold (Nevins et al., 2005).  
233 This extraction technique has been shown by MA-A to have high extraction efficiency for  
234 songbird plasma (96%, Abolins-Abols, Hope, & Ketterson, 2016). Therefore, to limit the  
235 logistical challenges associated radioactivity-based efficiency measurements, we did not  
236 measure extraction efficiency in this study (Virgin & Rosvall, 2018).

237         The plasma extract was suspended in 600  $\mu$ l assay buffer provided with the kit by  
238 vortexing for 1 min before storing it at 4 °C overnight. The corticosterone concentration of the  
239 extract was measured following the instructions from the kit manufacturer. We first validated the  
240 Cayman corticosterone assay to determine that robin plasma extracts reacted with the assay as  
241 expected. The assay showed good parallelism (slope=1.00;  $r^2=0.99$ ), sensitivity (10.7 pg/mL),  
242 and recovery (88.9%). We then ran the extracted samples in triplicate, using a pooled robin  
243 plasma extract as a within- and across-plate control. We used a Biotek 800TS plate reader to  
244 record assay absorbance at 405 nm. Data were analyzed using a 4-point logistic curve using  
245 the analysis spreadsheet provided by Cayman Chemical. All samples fell within 20-80% B/Bo  
246 range. The among-plate coefficient of variation (CV) was 16.4%, whereas the within-plate CV  
247 was 5.17%. We averaged the data from the 3 replicates, and standardized sample  
248 concentrations across plates using the mean concentration of the control samples.

249

## 250 **Data Analysis**

251         We first investigated if corticosterone levels in robin females were related to the timing of  
252 capture and blood sampling. While in most animals corticosterone levels start rising after 3 min,  
253 and therefore a blood sample taken under 3 min post capture can be considered a “baseline”  
254 sample (Romero & Reed, 2005), in some cases corticosterone levels start rising earlier (Small  
255 et al., 2017). In our data, corticosterone levels were positively correlated with the blood

256 collection start time - circulating corticosterone in robins started to increase soon after capture  
257 (estimate=0.02 ng/ml increase per s;  $r^2=0.16$ ;  $p=0.02$ , Figure S1). We therefore corrected for the  
258 variation in corticosterone as a function of the blood collection start time by running a linear  
259 regression between these variables, and used the residuals as a bleed time-independent  
260 measure of baseline corticosterone levels. We chose to use the blood collection start time as  
261 opposed to the end time, because in the majority of cases we ended blood collection at exactly  
262 3 min. No other covariates (time of day, time since nest approach, time taken to set up the mist  
263 net) were related to corticosterone levels (all  $p > 0.05$ , data not shown).

264 We used generalized linear models (GLMs) with binomial error structure in R (R Core  
265 Team, 2017) to ask if rejection of the model eggs was related to the following ecological and  
266 proximate factors, all of which were known to be linked to egg rejection in brood parasite hosts,  
267 including robins: the date of model egg addition (Dainson, Hauber, López, Grim, & Hanley,  
268 2017), age (Moskát et al., 2014), mass (Peer & Sealy, 2004), incubation stage relative to clutch  
269 completion (further as “days since clutch completion”; Marchetti, 2000), the number of eggs in  
270 the nest at the time of experimentation (Moskát & Hauber, 2007), and baseline corticosterone  
271 (Ruiz-Raya et al., 2018). We did not have any *a priori* expectations for interactions between  
272 these variables. All predictors were standardized to mean 0 and standard deviation of 1.

273 To investigate which of our observed predictor variables best explained egg rejection  
274 we used information-theoretic (IT) approach, combined with model averaging (Burnham,  
275 Anderson, & Huyvaert, 2011; Symonds & Moussalli, 2011). The emerging consensus for animal  
276 behavior-relevant studies is that IT-based model averaging approaches are better suited for  
277 hypothesis testing with correlative datasets from natural study systems compared to the more  
278 traditional p-value based approaches (Aho, Derryberry, & Peterson, 2014). In short, an IT-based  
279 approach allows one to compare the strength of evidence for various competing alternative  
280 models that may explain the variation in a variable (here: egg rejection), while a frequentist p-  
281 value-based approach is a better fit for controlled experiments with a defined null hypothesis

282 (Murtaugh, 2014; Valpine, 2014). An IT approach is especially useful when, as is the case in our  
283 data, there are a number of independent candidate predictors that may explain variation the  
284 response variable, but where a model with all of the covariates may not necessarily generate  
285 the best model. Model averaging of competing models, in turn, allows one to evaluate the  
286 strength of evidence supporting a relationship between a particular independent variable and  
287 the dependent variable (here, the probability of egg rejection). Nevertheless, we have also  
288 provided p-values for the variables included in the best models to aid in data interpretation.

289 We used the package *MuMIn* (Bartoń, 2018) to calculate the corrected Akaike  
290 information criterion (AICc) scores for the models that contained all combinations of predictors  
291 (without interaction terms) to determine the model that was most likely to be the best model.  
292 Ten models had AICc scores higher than the null model. We calculated the goodness of fit of  
293 each of these top models in relation to the null model using the package *lmtest* (Zeileis &  
294 Hothorn, 2002). To estimate how much variance the top models explained, we used the  
295 package *pscl* (Jackman, 2017) to calculate McFadden's pseudo- $R^2$ . Seven models had AICc  
296 scores that were within 2.0 units of the top model, indicating a level of uncertainty of which  
297 variables contributed to the best model. We, therefore, also followed a model averaging  
298 approach (Burnham et al., 2011; Symonds & Moussalli, 2011): we calculated the relative  
299 importance of each independent variable within the models with cumulative AICc weights of  
300 0.95, i.e. a set that had a 95% probability of including the best model.

301

## 302 Results

303

304 Among the 31 female American Robins that were included in the analyses, 18 (58.1%)  
305 ejected the model egg within 24 hrs.

306 Out of candidate 64 statistical models testing the predictors of the probability of egg  
307 rejection, 10 had AICc-s higher than the null model, which included no predictor variables (Table

308 1). However, these models were highly competitive, with seven top models being within 2.0  
309 AICc-s of each other. The seven top models included egg number, days since clutch  
310 completion, corticosterone levels, and mass as the predictors of egg rejection. The model with  
311 the lowest AICc (41.80) suggested that females with more eggs in the nest at the time of  
312 experimentation were significantly less likely to reject the model egg (Figure 2). However, based  
313 on the corrected Akaike weights ( $w_i=0.11$ ), this model only had 11% overall probability of being  
314 the best model for explaining egg rejection behavior, and it explained only 11% of overall  
315 variation in egg rejection ( $r^2=0.11$ ). An equally competitive model (AICc=42.75,  $\Delta$ AICc=0.95,  
316  $w_i=0.07$ ,  $r^2=0.28$ ), included all of the covariates present in the 7 top models, and suggested that  
317 females with smaller clutch sizes, lower mass, lower corticosterone levels, and those whose  
318 nests were parasitized earlier with respect to their clutch completion were more likely to reject  
319 the model eggs (Table 2).

320 Despite the uncertainty of the composition of the best model, likelihood ratio tests  
321 showed that all except two of the top 7 models with  $\Delta$ AICc < 2.0 were significantly better  
322 predictors of egg rejection behavior compared to the null model (Table 1). The number of eggs  
323 term was present in 6 out of 7 top models, with the only exception being a model that only  
324 contained corticosterone levels. Other predictors among the 7 models with  $\Delta$ AICc < 2.0 -  
325 corticosterone, mass, and days since clutch completion - were present in 3 out of the 7 top  
326 models (Figure 2). The full model which included all of the covariates had a much lower AICc  
327 than the null model (Table 1).

328 Model averaging of all models with cumulative Akaike weight of 0.95 echoed the  
329 patterns of individual top models and suggested that the number of eggs at the time of the  
330 experimental parasitism was consistently the strongest predictor of egg rejection – birds with  
331 less eggs in the nest had a higher probability of egg rejection. This metric was present in 26 out  
332 of 45 models with a relative importance of 0.72 (Table 3). The other 3 predictors occurring in

333 some of the top 7 models, had a weaker relationship to egg rejection: birds with lower mass  
334 (importance: 0.46, present in 24 out of 45 models), lower corticosterone levels (importance:  
335 0.44, present in 21 out of 45 models), and birds experimentally parasitized earlier with respect  
336 to the clutch completion date (importance: 0.37, present in 18 of 45 models) were more likely to  
337 reject the model eggs.

338

339

## Discussion

340 Rejection of parasitic eggs by hosts is one of the most widespread and effective  
341 defenses against avian brood parasites (Davies, 2000; Soler, 2017). However, different host  
342 species and, at an intraspecific level, different individuals show substantial variation in the  
343 propensity to reject foreign eggs from their nests (Alvarez, 1996; Brooke, Davies, & Noble,  
344 1998; Bård G. Stokke, Moksnes, & Røskaft, 2005). Here we asked if cognitive, physiological,  
345 and life-history factors predict variation in egg rejection by a brood parasite host. Our  
346 correlational data set and model averaging approach showed that, in decreasing order of  
347 importance, among the most likely factors that may explain variation in model egg rejection by  
348 American Robins were the number of eggs in the nest at the time of the experimental  
349 parasitism, adult mass, the baseline corticosterone level, and the incubation stage relative to  
350 clutch completion: females with smaller clutches, lower mass, lower corticosterone, and those  
351 parasitized sooner after clutch completion were more likely to reject the model eggs. These  
352 relationships suggest that egg rejection is a complex behavior that is regulated by a diversity of  
353 factors.

354 The strongest and most consistent predictor of egg rejection in our models was clutch  
355 size, indicating that females with smaller clutches at the time of experimental parasitism were  
356 more likely to reject the model egg within a day compared to females with larger clutches.  
357 Because all of the females that were included in the analysis had completed laying their

358 clutches at the time of experimental parasitism, this suggests that this relationship is not driven  
359 by variation in whether or not the clutch was completed, but by the final clutch size.

360         The effect of clutch size (and, thus, the parasite-to-host egg ratio) on egg rejection  
361 appears to vary between studies and species. On the one hand, multiple parasitism (higher  
362 ratio) has been shown to reduce the rejection of parasitic eggs (Bán et al., 2013; Manna et al.,  
363 2019; Moskát et al., 2009; M. Stevens et al., 2013) supporting the hypothesis that the ability of  
364 hosts to reject eggs is compromised because multiple eggs can be perceived as the most  
365 different when using a discordancy-based egg rejection mechanism (but see Lang, Bollinger, &  
366 Peer, 2014). On the other hand, irrespective of the extent of parasitism, greater absolute  
367 variation in egg coloration, associated with larger host clutches, has also been suggested to  
368 decrease the host's ability to detect the foreign egg (Øein, Moksnes, & Røskaft, 1995). In  
369 support of this hypothesis, higher within-clutch variation due to more variable host eggs, or a  
370 bigger difference between the host and parasite egg colors, is associated with lower probability  
371 of egg rejection in mimetic parasite-host systems (Moskát et al., 2008; Stokke, Moksnes,  
372 Roskaft, Rudolfsen, & Honza, 1999), although it causes no change in egg rejection in non-  
373 mimetic parasite-host systems (Abernathy & Peer, 2014; Rebecca Croston & Hauber, 2015;  
374 Lang et al., 2014).

375         Yet another hypothesis that has not so far been explicitly addressed in host-brood  
376 parasite systems is that the proportion of parasite-to-host eggs in the nest affects the ability of  
377 hosts to perceive the parasitic egg due to the way animals respond to proportional differences in  
378 stimuli (Weber's law; Akre, Farris, Lea, Page, & Ryan, 2011; Akre & Johnsen, 2014; Weber,  
379 1978). Akre & Johnsen (2014) specifically proposed that in avian host-brood parasite systems,  
380 hosts may be better able to detect a parasitic egg if it is laid in a smaller clutch as opposed to a  
381 larger clutch. This is because in a smaller clutch, the addition of a parasitic egg causes a larger  
382 proportional increase compared to a large clutch. This, in turn, makes foreign eggs in smaller  
383 clutches easier to perceive and reject. The relationship between model egg rejection and clutch

384 size in our study is consistent with the predictions of Weber's law of proportional processing as  
385 applied to avian host-parasite systems (Akre & Johnsen, 2014). Importantly, however, because  
386 robins do not reject mimetic eggs (Luro et al., 2018; Rothstein, 1982), the relationship between  
387 clutch size and egg rejection in robins cannot be explained by a proportional increase in the  
388 clutch size alone (irrespective of color). Instead, a larger relative increase in the clutch size may  
389 affect the color threshold at which eggs are rejected (Abolins-Abols et al., 2019; Hanley et al.,  
390 2017, 2019). We suggest that proportional processing may therefore constitute an important  
391 aspect of the cognitive and perceptual processes, which, in concert, regulate egg rejection.

392 Female mass was negatively related to the rejection of model eggs in our study,  
393 indicating that heavier females either had higher thresholds for rejection of model eggs or  
394 showed, on average, higher maternal motivation to respond affiliatively towards (all) eggs. Mass  
395 has been associated with egg rejection in inter-specific comparisons (Peer & Sealy, 2004),  
396 where larger species are more likely to reject parasitic eggs. At an intraspecific level, heavier  
397 females may have higher expected future reproductive success (Abolins-Abols & Ketterson,  
398 2017; Blums, Clark, & Mednis, 2002), possibly leading to a reduced sensitivity to parasitic  
399 stimuli. More focal experimental work will be needed to assess the mechanisms behind this  
400 association.

401 We also found evidence that females with lower corticosterone levels rejected the model  
402 eggs more rapidly, although the support for this relationship was statistically weak. This finding  
403 contradicts our prediction that, because higher corticosterone levels may lead to suppression of  
404 maternal attachment to eggs, robin females with higher baseline corticosterone levels should be  
405 more likely to reject the model eggs (Abolins-Abols & Hauber, 2018). However, we consider the  
406 alternative, namely that corticosterone may increase the motivation to care for eggs, unlikely.  
407 Instead, we argue that corticosterone levels may covary with or influence other phenotypic,  
408 sensory, and/or cognitive traits that are linked to egg perception, attention and, indirectly, to egg



409 rejection propensity. Experimental tests with manipulated circulating hormone levels will be  
410 needed to assess these alternatives fully.

411 Finally, we found support for the pattern that females that experienced experimental  
412 parasitism earlier into the incubation stage were more likely to reject the model eggs. This  
413 agrees with similar findings in other avian host-parasite systems, where females are more likely  
414 to reject eggs earlier into the incubation stage of nesting (Moskát, 2005). This finding is  
415 consistent with at least two alternative hypotheses. First, because brood parasites target hosts  
416 nests during laying to ensure that the parasitic chicks hatch earlier or at the same time as host  
417 chicks, hosts should be selected to respond more selectively towards brood parasite eggs  
418 earlier in laying/incubation (Moskát, 2005). Alternatively, hosts may be less willing to eject any  
419 eggs later in incubation as a consequence of increasing general maternal motivation to care for  
420 advanced eggs or nestlings (Knight & Temple, 1986; Montgomerie & Weatherhead, 1988).  
421 Proximally, both of these alternative motivations – decrease in agonistic responses against  
422 brood parasitic stimuli, and an increase in general maternal motivation – may be mediated by  
423 hormones that regulate maternal care and motivation in other organisms, such as prolactin,  
424 estradiol, and progesterone (Abolins-Abols & Hauber, 2018; Bridges, Numan, Ronsheim, Mann,  
425 & Lupini, 1990; Cheng & Silver, 1975). Future studies should therefore also address these  
426 potential endocrine mediators of egg rejection observationally and experimentally.

427 In summary, we show that predicting egg rejection by American Robins requires  
428 complex models, and that this behavior is likely regulated by the perceptual environment, life  
429 history, as well as physiological factors. These factors may contribute to both plastic as well as  
430 individually consistent variation in egg rejection, although further studies are needed to  
431 experimentally establish the precise causal links between these variables and host behavior.  
432 Despite our extensive efforts to include a diversity of proximate factors to understand variation  
433 in egg rejection, our best models were able to explain only 28% of variation in the rejection

434 behavior. Research to assess what other factors underlie and cause variation in this ecologically

435 and evolutionarily indispensable behavior therefore remains a potentially fruitful field.

436

437  
438  
439  
440  
441  
442  
443  
444  
445  
446  
447  
448  
449  
450  
451  
452  
453  
454  
455  
456  
457  
458  
459  
460

## References

- Abernathy, V. E., & Peer, B. D. (2014). Intraclutch variation in egg appearance of Brown-headed Cowbird hosts. *The Auk*, *131*, 467–475. <https://doi.org/10.1642/AUK-12-186-R1.1>
- Abolins-Abols, M., Hanley, D., Moskát, C., Grim, T., & Hauber, M. E. (2019). Anti-parasitic egg rejection by great reed warblers (*Acrocephalus arundinaceus*) tracks differences along an eggshell color gradient. *Behavioural Processes*, *166*, 103902. <https://doi.org/10.1016/j.beproc.2019.103902>
- Abolins-Abols, M., & Hauber, M. E. (2018). Host defences against avian brood parasitism: an endocrine perspective. *Proceedings of the Royal Society B: Biological Sciences*, *285*, 20180980. <https://doi.org/10.1098/rspb.2018.0980>
- Abolins-Abols, M., Hope, S. F., & Ketterson, E. D. (2016). Effect of acute stressor on reproductive behavior differs between urban and rural birds. *Ecology and Evolution*, *6*, 6546–6555. <https://doi.org/10.1002/ece3.2347>
- Abolins-Abols, M., & Ketterson, E. D. (2017). Condition explains individual variation in mobbing behavior. *Ethology*, *123*, 495–502. <https://doi.org/10.1111/eth.12625>
- Aho, K., Derryberry, D., & Peterson, T. (2014). Model selection for ecologists: the worldviews of AIC and BIC. *Ecology*, *95*, 631–636. <https://doi.org/10.1890/13-1452.1>
- Akre, K. L., Farris, H. E., Lea, A. M., Page, R. A., & Ryan, M. J. (2011). Signal perception in frogs and bats and the evolution of mating signals. *Science*, *333*, 751–752. <https://doi.org/10.1126/science.1205623>
- Akre, K. L., & Johnsen, S. (2014). Psychophysics and the evolution of behavior. *Trends in Ecology & Evolution*, *29*, 291–300. <https://doi.org/10.1016/j.tree.2014.03.007>

- 461 Alvarez, F. (1996). Model Cuckoo *Cuculus canorus* eggs accepted by Rufous Bush Chats  
462 *Cercotrichas galactotes* during the parasite's absence from the breeding area. *Ibis*, *138*,  
463 340–342. <https://doi.org/10.1111/j.1474-919X.1996.tb04349.x>
- 464 Avilés, J. M. (2008). Egg colour mimicry in the common cuckoo *Cuculus canorus* as revealed by  
465 modelling host retinal function. *Proceedings of the Royal Society B: Biological Sciences*,  
466 *275*, 2345–2352. <https://doi.org/10.1098/rspb.2008.0720>
- 467 Avilés, J. M. (2018). Can hosts tolerate avian brood parasites? An appraisal of mechanisms.  
468 *Behavioral Ecology*, *29*, 509–519. <https://doi.org/10.1093/beheco/ax150>
- 469 Avilés, J. M., & Parejo, D. (2011). Host personalities and the evolution of behavioural  
470 adaptations in brood parasitic–host systems. *Animal Behaviour*, *82*, 613–618.  
471 <https://doi.org/10.1016/j.anbehav.2011.07.025>
- 472 Bán, M., Moskát, C., Barta, Z., & Hauber, M. E. (2013). Simultaneous viewing of own and  
473 parasitic eggs is not required for egg rejection by a cuckoo host. *Behavioral Ecology*, *24*,  
474 1014–1021. <https://doi.org/10.1093/beheco/art004>
- 475 Bartoń, K. (2018). MuMIn: Multi-Model Inference (Version 1.42.1). Vienna, Austria: The  
476 Comprehensive R Archive Network (CRAN). Retrieved from [https://CRAN.R-](https://CRAN.R-project.org/package=MuMIn)  
477 [project.org/package=MuMIn](https://CRAN.R-project.org/package=MuMIn)
- 478 Baugh, A. T., Senft, R. A., Firke, M., Lauder, A., Schroeder, J., Meddle, S. L., ... Hau, M. (2017).  
479 Risk-averse personalities have a systemically potentiated neuroendocrine stress axis: A  
480 multilevel experiment in *Parus major*. *Hormones and Behavior*, *93*, 99–108.  
481 <https://doi.org/10.1016/j.yhbeh.2017.05.011>

- 482 Blums, P., Clark, R. G., & Mednis, A. (2002). Patterns of reproductive effort and success in birds:  
483 path analyses of long-term data from European ducks. *Journal of Animal Ecology*, *71*,  
484 280–295. <https://doi.org/10.1046/j.1365-2656.2002.00598.x>
- 485 Bridges, R. S. (2015). Neuroendocrine regulation of maternal behavior. *Frontiers in*  
486 *Neuroendocrinology*, *36*, 178–196. <https://doi.org/10.1016/j.yfrne.2014.11.007>
- 487 Bridges, R. S., Numan, M., Ronsheim, P. M., Mann, P. E., & Lupini, C. E. (1990). Central prolactin  
488 infusions stimulate maternal behavior in steroid-treated, nulliparous female rats.  
489 *Proceedings of the National Academy of Sciences of the United States of America*, *87*,  
490 8003–8007. <https://doi.org/10.1073/pnas.87.20.8003>
- 491 Brooke, M. de L., Davies, N. B., & Noble, D. G. (1998). Rapid decline of host defences in  
492 response to reduced cuckoo parasitism: behavioural flexibility of reed warblers in a  
493 changing world. *Proceedings of the Royal Society B: Biological Sciences*, *265*, 1277–1282.  
494 <https://doi.org/10.1098/rspb.1998.0430>
- 495 Burnham, K. P., Anderson, D. R., & Huyvaert, K. P. (2011). AIC model selection and multimodel  
496 inference in behavioral ecology: some background, observations, and comparisons.  
497 *Behavioral Ecology and Sociobiology*, *65*, 23–35. [https://doi.org/10.1007/s00265-010-](https://doi.org/10.1007/s00265-010-1029-6)  
498 1029-6
- 499 Cheng, M.-F., & Silver, R. (1975). Estrogen-progesterone regulation of nest-building and  
500 incubation behavior in ovariectomized Ring Doves (*Streptopelia risoria*). *Journal of*  
501 *Comparative and Physiological Psychology*, *88*, 256–263.  
502 <https://doi.org/10.1037/h0076181>

- 503 Croston, R., & Hauber, M. E. (2014a). High repeatability of egg rejection in response to  
504 experimental brood parasitism in the American robin (*Turdus migratorius*). *Behaviour*,  
505 *151*, 703–718. <https://doi.org/10.1163/1568539X-00003164>
- 506 Croston, R., & Hauber, M. E. (2014b). Spectral tuning and perceptual differences do not explain  
507 the rejection of brood parasitic eggs by American robins (*Turdus migratorius*).  
508 *Behavioral Ecology and Sociobiology*, *68*, 351–362. [https://doi.org/10.1007/s00265-013-](https://doi.org/10.1007/s00265-013-1649-8)  
509 *1649-8*
- 510 Croston, R., & Hauber, M. E. (2015). Experimental shifts in intraclutch egg color variation do not  
511 affect egg rejection in a host of a non-egg-mimetic avian brood parasite. *PLoS ONE*, *10*,  
512 e0121213. <https://doi.org/10.1371/journal.pone.0121213>
- 513 Dainson, M., Hauber, M. E., López, A. V., Grim, T., & Hanley, D. (2017). Does contrast between  
514 eggshell ground and spot coloration affect egg rejection? *The Science of Nature*, *104*, 54.  
515 <https://doi.org/10.1007/s00114-017-1476-2>
- 516 Davies, N. B. (2000). *Cuckoos, Cowbirds, and Other Cheats*. London, UK: Poyser.
- 517 Davies, N. B., Brooke, L. M., & Kacelnik, A. (1996). Recognition errors and probability of  
518 parasitism determine whether reed warblers should accept or reject mimetic cuckoo  
519 eggs. *Proceedings of the Royal Society of London B: Biological Sciences*, *263*, 925–931.  
520 <https://doi.org/10.1098/rspb.1996.0137>
- 521 Davies, N. B., & Brooke, M. de L. (1988). Cuckoos versus reed warblers: Adaptations and  
522 counteradaptations. *Animal Behaviour*, *36*, 262–284. [https://doi.org/10.1016/S0003-](https://doi.org/10.1016/S0003-3472(88)80269-0)  
523 *3472(88)80269-0*

- 524 Feeney, W. E., Welbergen, J. A., & Langmore, N. E. (2012). The frontline of avian brood parasite-  
525 host coevolution. *Animal Behaviour*, *84*, 3–12.  
526 <https://doi.org/10.1016/j.anbehav.2012.04.011>
- 527 Feeney, W. E., Welbergen, J. A., & Langmore, N. E. (2014). Advances in the study of coevolution  
528 between avian brood parasites and their hosts. *Annual Review of Ecology, Evolution,*  
529 *and Systematics*, *45*, 227–246. <https://doi.org/10.1146/annurev-ecolsys-120213-091603>
- 530 Grim, T., Samaš, P., & Hauber, M. E. (2014). The repeatability of avian egg ejection behaviors  
531 across different temporal scales, breeding stages, female ages and experiences.  
532 *Behavioral Ecology and Sociobiology*, *68*, 749–759. [https://doi.org/10.1007/s00265-014-](https://doi.org/10.1007/s00265-014-1688-9)  
533 [1688-9](https://doi.org/10.1007/s00265-014-1688-9)
- 534 Grim, T., Samaš, P., Moskát, C., Kleven, O., Honza, M., Moksnes, A., ... Stokke, B. G. (2011).  
535 Constraints on host choice: why do parasitic birds rarely exploit some common potential  
536 hosts? *Journal of Animal Ecology*, *80*, 508–518. [https://doi.org/10.1111/j.1365-](https://doi.org/10.1111/j.1365-2656.2010.01798.x)  
537 [2656.2010.01798.x](https://doi.org/10.1111/j.1365-2656.2010.01798.x)
- 538 Hanley, D., Grim, T., Iqic, B., Samaš, P., Lopez, A. V., Shawkey, M. D., & Hauber, M. E. (2017). Egg  
539 discrimination along a gradient of natural variation in eggshell coloration. *Proceedings of*  
540 *the Royal Society B: Biological Sciences*, *284*, 201625920.  
541 <https://doi.org/10.1098/rspb.2016.2592>
- 542 Hanley, D., López, A. V., Fiorini, V. D., Reboreda, J. C., Grim, T., & Hauber, M. E. (2019). Variation  
543 in multicomponent recognition cues alters egg rejection decisions: a test of the optimal  
544 acceptance threshold hypothesis. *Philosophical Transactions of the Royal Society B:*  
545 *Biological Sciences*, *374*, 20180195. <https://doi.org/10.1098/rstb.2018.0195>

- 546 Hauber, M. E., Moskát, C., & Bán, M. (2006). Experimental shift in hosts' acceptance threshold  
547 of inaccurate-mimic brood parasite eggs. *Biology Letters*, *2*, 177–80.  
548 <https://doi.org/10.1098/rsbl.2005.0438>
- 549 Hauber, M. E., Samaš, P., Anderson, M. G., Rutila, J., Low, J., Cassey, P., & Grim, T. (2014). Life-  
550 history theory predicts host behavioural responses to experimental brood parasitism.  
551 *Ethology Ecology & Evolution*, *26*, 349–364.  
552 <https://doi.org/10.1080/03949370.2013.851121>
- 553 Honza, M., Požgayová, M., Procházka, P., & Tkadlec, E. (2007). Consistency in egg rejection  
554 behaviour: responses to repeated brood parasitism in the blackcap (*Sylvia atricapilla*).  
555 *Ethology*, *113*, 344–351. <https://doi.org/10.1111/j.1439-0310.2007.01340.x>
- 556 Honza, M., Procházka, P., Morongová, K., Čapek, M., & Jelínek, V. (2011). Do nest light  
557 conditions affect rejection of parasitic eggs? A test of the light environment hypothesis.  
558 *Ethology*, *117*, 539–546. <https://doi.org/10.1111/j.1439-0310.2011.01900.x>
- 559 Horton, B. M., & Holberton, R. L. (2009). Corticosterone manipulations alter morph-specific  
560 nestling provisioning behavior in male white-throated sparrows, *Zonotrichia albicollis*.  
561 *Hormones and Behavior*, *56*, 510–518. <https://doi.org/10.1016/j.yhbeh.2009.09.001>
- 562 Igc, B., Nunez, V., Voss, H. U., Croston, R., Aidala, Z., López, A. V., ... Hauber, M. E. (2015). Using  
563 3D printed eggs to examine the egg-rejection behaviour of wild birds. *PeerJ*, *3*, e965.  
564 <https://doi.org/10.7717/peerj.965>
- 565 Jackman, S. (2017). *pscl: Classes and methods for r developed in the political science*  
566 *computational laboratory*. Sydney, Australia: United States Studies Centre, University of  
567 Sydney.



- 568 Knight, R. L., & Temple, S. A. (1986). Why does intensity of avian nest defense increase during  
569 the nesting cycle? *The Auk*, *103*, 318–327.
- 570 Lang, A. K., Bollinger, E. K., & Peer, B. D. (2014). Effect of parasite-to-host egg ratio on egg  
571 rejection by a brown-headed cowbird host. *The Auk*, *131*, 694–701.
- 572 Langmore, N. E., Stevens, M., Maurer, G., & Kilner, R. M. (2009). Are dark cuckoo eggs cryptic in  
573 host nests? *Animal Behaviour*, *78*, 461–468.  
574 <https://doi.org/10.1016/j.anbehav.2009.06.003>
- 575 Luro, A. B., & Hauber, M. E. (2017). A test of the nest sanitation hypothesis for the evolution of  
576 foreign egg rejection in an avian brood parasite rejecter host species. *Science of Nature*,  
577 *104*, 14. <https://doi.org/10.1007/s00114-017-1446-8>
- 578 Luro, A. B., Ijic, B., Croston, R., López, A. V., Shawkey, M. D., & Hauber, M. E. (2018). Which egg  
579 features predict egg rejection responses in American robins? Replicating Rothstein’s  
580 (1982) study. *Ecology and Evolution*, *8*, 1673–1679. <https://doi.org/10.1002/ece3.3759>
- 581 MacDougall-Shackleton, S. A., Bonier, F., Romero, L. M., & Moore, I. T. (2019). Glucocorticoids  
582 and “stress” are not synonymous. *Integrative Organismal Biology*, *1*:obz017  
583 <https://doi.org/10.1093/iob/obz017>
- 584 Manna, T. J., Moskát, C., Tong, L., Bán, M., Aidala, Z., Low, J., & Hauber, M. E. (2019). Multiple  
585 parasitism reduces egg rejection in the host (*Acrocephalus arundinaceus*) of a mimetic  
586 avian brood parasite (*Cuculus canorus*). *Journal of Comparative Psychology*, *133*, 351–  
587 358. <http://dx.doi.org/10.1037/com0000166>

- 588 Manna, T., M. Moskát, & Hauber, M. E. (2017). Cognitive decision rules for egg rejection. In M.  
589 Soler (Ed.), *Avian brood parasitism - behaviour, ecology, evolution and coevolution* (pp.  
590 437–448). Cham, Switzerland: Springer International Publishing.
- 591 Marchetti, K. (2000). Egg rejection in a passerine bird: size does matter. *Animal Behaviour*, *59*,  
592 877–883. <https://doi.org/10.1006/anbe.1999.1388>
- 593 Mark, M. M., & Rubenstein, D. R. (2013). Physiological costs and carry-over effects of avian  
594 interspecific brood parasitism influence reproductive tradeoffs. *Hormones and Behavior*,  
595 *63*, 717–722. <https://doi.org/10.1016/j.yhbeh.2013.03.008>
- 596 Moksnes, A., & Røskaft, E. (1992). Responses of some rare cuckoo hosts to mimetic model  
597 cuckoo eggs and to foreign conspecific eggs. *Ornis Scandinavica*, *23*, 17–23.  
598 <https://doi.org/10.2307/3676422>
- 599 Molina-Morales, M., Martínez, J. G., Martín-Gálvez, D., Dawson, D. A., Burke, T., & Avilés, J. M.  
600 (2014). Cuckoo hosts shift from accepting to rejecting parasitic eggs across their  
601 lifetime. *Evolution*, *68*, 3020–3029. <https://doi.org/10.1111/evo.12471>
- 602 Montgomerie, R. D., & Weatherhead, P. J. (1988). Risks and rewards of nest defence by parent  
603 birds. *The Quarterly Review of Biology*, *63*, 167–187.
- 604 Moskát, C. (2005). Nest defence and egg rejection in great reed warblers over the breeding  
605 cycle: are they synchronised with the risk of brood parasitism? *Annales Zoologici Fennici*,  
606 *42*, 579–586.
- 607 Moskát, C., Avilés, J. M., Bán, M., Hargitai, R., & Zölei, A. (2008). Experimental support for the  
608 use of egg uniformity in parasite egg discrimination by cuckoo hosts. *Behavioral Ecology*  
609 *and Sociobiology*, *62*, 1885. <https://doi.org/10.1007/s00265-008-0618-0>

- 610 Moskát, C., Bán, M., & Hauber, M. E. (2014). Naïve hosts of avian brood parasites accept foreign  
611 eggs, whereas older hosts fine-tune foreign egg discrimination during laying. *Frontiers in*  
612 *Zoology*, *11*, 45. <https://doi.org/10.1186/1742-9994-11-45>
- 613 Moskát, C., & Hauber, M. E. (2007). Conflict between egg recognition and egg rejection  
614 decisions in common cuckoo (*Cuculus canorus*) hosts. *Animal Cognition*, *10*, 377–386.  
615 <https://doi.org/10.1007/s10071-007-0071-x>
- 616 Moskát, C., Hauber, M. E., Avilés, J. M., Bán, M., Hargitai, R., & Honza, M. (2009). Increased host  
617 tolerance of multiple cuckoo eggs leads to higher fledging success of the brood parasite.  
618 *Animal Behaviour*, *77*, 1281–1290. <https://doi.org/10.1016/j.anbehav.2009.01.030>
- 619 Moskát, C., Zölei, A., Bán, M., Elek, Z., Tong, L., Geltsch, N., & Hauber, M. E. (2014). How to Spot  
620 a Stranger’s Egg? A Mimicry-Specific Discordancy Effect in the Recognition of Parasitic  
621 Eggs. *Ethology*, *120*, 616–626. <https://doi.org/10.1111/eth.12234>
- 622 Murtaugh, P. A. (2014). In defense of P values. *Ecology*, *95*, 611–617.  
623 <https://doi.org/10.1890/13-0590.1>
- 624 Nevins, C. P., Vierck, J. L., Bogachus, L. D., Velotta, N. S., Castro-Munozledo, F., & Dodson, M. V.  
625 (2005). An inexpensive method for applying nitrogen evaporation to hexane-containing  
626 24- or 96-well plates. *Cytotechnology*, *49*, 71–75. [https://doi.org/10.1007/s10616-005-](https://doi.org/10.1007/s10616-005-5876-3)  
627 [5876-3](https://doi.org/10.1007/s10616-005-5876-3)
- 628 Øein, I. J., Moksnes, A., & Røskaft, E. (1995). Evolution of variation in egg color and marking  
629 pattern in European passerines: adaptations in a revolutionary arms race with the  
630 cuckoo, *Cuculus canorus*. *Behavioral Ecology*, *6*, 166–174.

- 631 Palomino, J. J., Martín-Vivaldi, M., Soler, M., & Soler, J. J. (1998). Females are responsible for  
632 ejection of cuckoo eggs in the rufous bush robin. *Animal Behaviour*, *56*, 131–136.  
633 <https://doi.org/10.1006/anbe.1998.0771>
- 634 Peer, B. D., & Sealy, S. G. (2004). Correlates of egg rejection in hosts of the brown-headed  
635 cowbird. *The Condor*, *106*, 580–599. <https://doi.org/10.1650/7412>
- 636 Pyle, P. (1997). *Identification guide to North American birds. Part 1, Columbidae to Ploceidae*.  
637 (Vol. I). Bolinas, CA: Slate Creek Press.
- 638 R Core Team. (2017). R: a language and environment for statistical computing (Version 3.3.3).  
639 Vienna, Austria: R Foundation for Statistical Computing.
- 640 Rensel, M. A., & Schoech, S. J. (2011). Repeatability of baseline and stress-induced  
641 corticosterone levels across early life stages in the Florida scrub-jay (*Aphelocoma*  
642 *coerulescens*). *Hormones and Behavior*, *59*, 497–502.  
643 <https://doi.org/10.1016/j.yhbeh.2011.01.010>
- 644 Richard-Yris, M. A., Leboucher, G., Chadwick, A., & Garnier, D. H. (1987). Induction of maternal  
645 behavior in incubating and non-incubating hens: Influence of hormones. *Physiology and*  
646 *Behavior*, *40*, 193–199. [https://doi.org/10.1016/0031-9384\(87\)90207-1](https://doi.org/10.1016/0031-9384(87)90207-1)
- 647 Romero, L. M., & Butler, L. K. (2007). Endocrinology of stress. *International Journal of*  
648 *Comparative Psychology*, *20*, 89–95.
- 649 Romero, L. M., & Reed, J. M. (2005). Collecting baseline corticosterone samples in the field: is  
650 under 3 min good enough? *Comparative Biochemistry and Physiology Part A: Molecular*  
651 *and Integrative Physiology*, *140*, 73–79. <https://doi.org/10.1016/j.cbpb.2004.11.004>

- 652 Romero, L. M., & Reed, J. M. (2008). Repeatability of baseline corticosterone concentrations.  
653 *General and Comparative Endocrinology*, 156, 27–33.  
654 <https://doi.org/10.1016/j.ygcen.2007.10.001>
- 655 Rothstein, S. I. (1975). Mechanisms of avian egg-recognition: Do birds know their own eggs?  
656 *Animal Behaviour*, 23, 268–278. [https://doi.org/10.1016/0003-3472\(75\)90075-5](https://doi.org/10.1016/0003-3472(75)90075-5)
- 657 Rothstein, S. I. (1982). Mechanisms of avian egg recognition: Which egg parameters elicit  
658 responses by rejecter species? *Behavioral Ecology and Sociobiology*, 11, 229–239.
- 659 Ruiz-Raya, F., Soler, M., Abaurrea, T., Chastel, O., Roncalli, G., & Ibáñez-Álamo, J. D. (2018).  
660 Hormonal responses to non-mimetic eggs: is brood parasitism a physiological stressor  
661 during incubation? *Behavioral Ecology and Sociobiology*, 72, 153.  
662 <https://doi.org/10.1007/s00265-018-2565-8>
- 663 Samaš, P., Hauber, M. E., Cassey, P., & Grim, T. (2011). Repeatability of foreign egg rejection:  
664 testing the assumptions of co-evolutionary theory. *Ethology*, 117, 606–619.  
665 <https://doi.org/10.1111/j.1439-0310.2011.01917.x>
- 666 Small, T. W., Bebus, S. E., Bridge, E. S., Elderbrock, E. K., Ferguson, S. M., Jones, B. C., & Schoech,  
667 S. J. (2017). Stress-responsiveness influences baseline glucocorticoid levels: Revisiting  
668 the under 3 min sampling rule. *General and Comparative Endocrinology*, 247, 152–165.  
669 <https://doi.org/10.1016/j.ygcen.2017.01.028>
- 670 Soler, M. (Ed.). (2017). *Avian brood parasitism: Behaviour, ecology, evolution and coevolution*.  
671 Cham, Switzerland: Springer.

- 672 Stevens, M., Troscianko, J., & Spottiswoode, C. N. (2013). Repeated targeting of the same hosts  
673 by a brood parasite compromises host egg rejection. *Nature Communications*, 4, 1–6.  
674 <https://doi.org/10.1038/ncomms3475>
- 675 Stevens, S. S. (1975). *Psychophysics: Introduction to its perceptual, neural, and social prospects*.  
676 New York, NY: Wiley.
- 677 Stoddard, M. C., & Stevens, M. (2011). Avian vision and the evolution of egg color mimicry in  
678 the common cuckoo. *Evolution*, 65, 2004–2013. [https://doi.org/10.1111/j.1558-](https://doi.org/10.1111/j.1558-5646.2011.01262.x)  
679 [5646.2011.01262.x](https://doi.org/10.1111/j.1558-5646.2011.01262.x)
- 680 Stokke, B. G., Moksnes, A., Roskaft, E., Rudolfson, G., & Honza, M. (1999). Rejection of artificial  
681 cuckoo (*Cuculus canorus*) eggs in relation to variation in egg appearance among reed  
682 warblers (*Acrocephalus scirpaceus*). *Proceedings of the Royal Society B: Biological*  
683 *Sciences*, 266, 1483. <https://doi.org/10.1098/rspb.1999.0804>
- 684 Stokke, Bård G., Moksnes, A., & Røskaft, E. (2005). The enigma of imperfect adaptations in  
685 hosts of avian brood parasites. *Ornithological Science*, 4, 17–29.  
686 <https://doi.org/10.2326/osj.4.17>
- 687 Symonds, M. R. E., & Moussalli, A. (2011). A brief guide to model selection, multimodel  
688 inference and model averaging in behavioural ecology using Akaike’s information  
689 criterion. *Behavioral Ecology and Sociobiology*, 65, 13–21.  
690 <https://doi.org/10.1007/s00265-010-1037-6>
- 691 Thorogood, R., & Davies, N. B. (2013). Reed warbler hosts fine-tune their defenses to track  
692 three decades of cuckoo decline. *Evolution*, 67, 3545–3555.  
693 <https://doi.org/10.1111/evo.12213>

- 694 Valpine, P. de. (2014). The common sense of P values. *Ecology*, *95*, 617–621.
- 695 <https://doi.org/10.1890/13-1271.1>
- 696 Vanderhoff, N., Pyle, P., Patten, M. A., Sallabanks, R., & James, F. C. (2016). American Robin  
697 (*Turdus migratorius*), version 2.0. In *The Birds of North America*. Ithaca, USA.: Cornell  
698 Lab of Ornithology.
- 699 Virgin, E. E., & Rosvall, K. A. (2018). Endocrine-immune signaling as a predictor of survival: A  
700 prospective study in developing songbird chicks. *General and Comparative*  
701 *Endocrinology*, *267*, 193–201. <https://doi.org/10.1016/j.ygcen.2018.08.008>
- 702 Weber, E. (1978). *The Sense of Touch*. London, UK: Academic Press.
- 703 Zeileis, A., & Hothorn, T. (2002). Diagnostic checking in regression relationships. *R News*, *2*, 7–  
704 10.
- 705

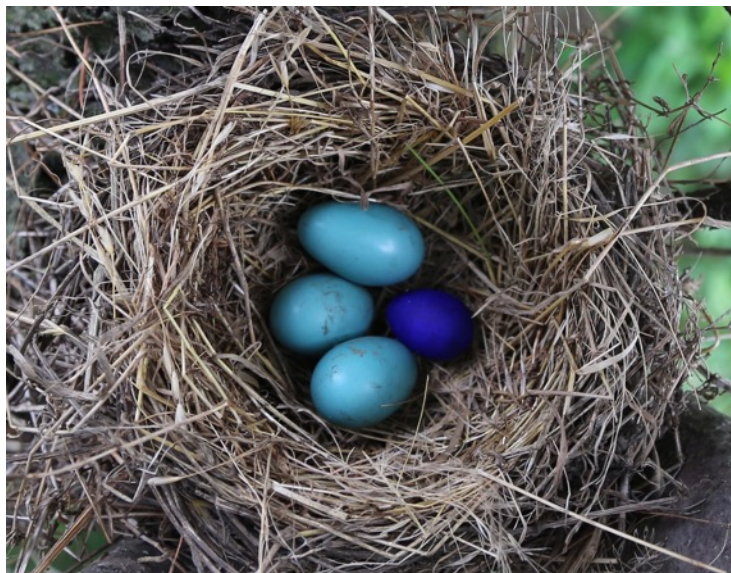

706  
707 *Figure 1.* Model egg (dark blue, right) alongside three natural American Robin eggs (light blue).  
708 Photo by MAA.  
709



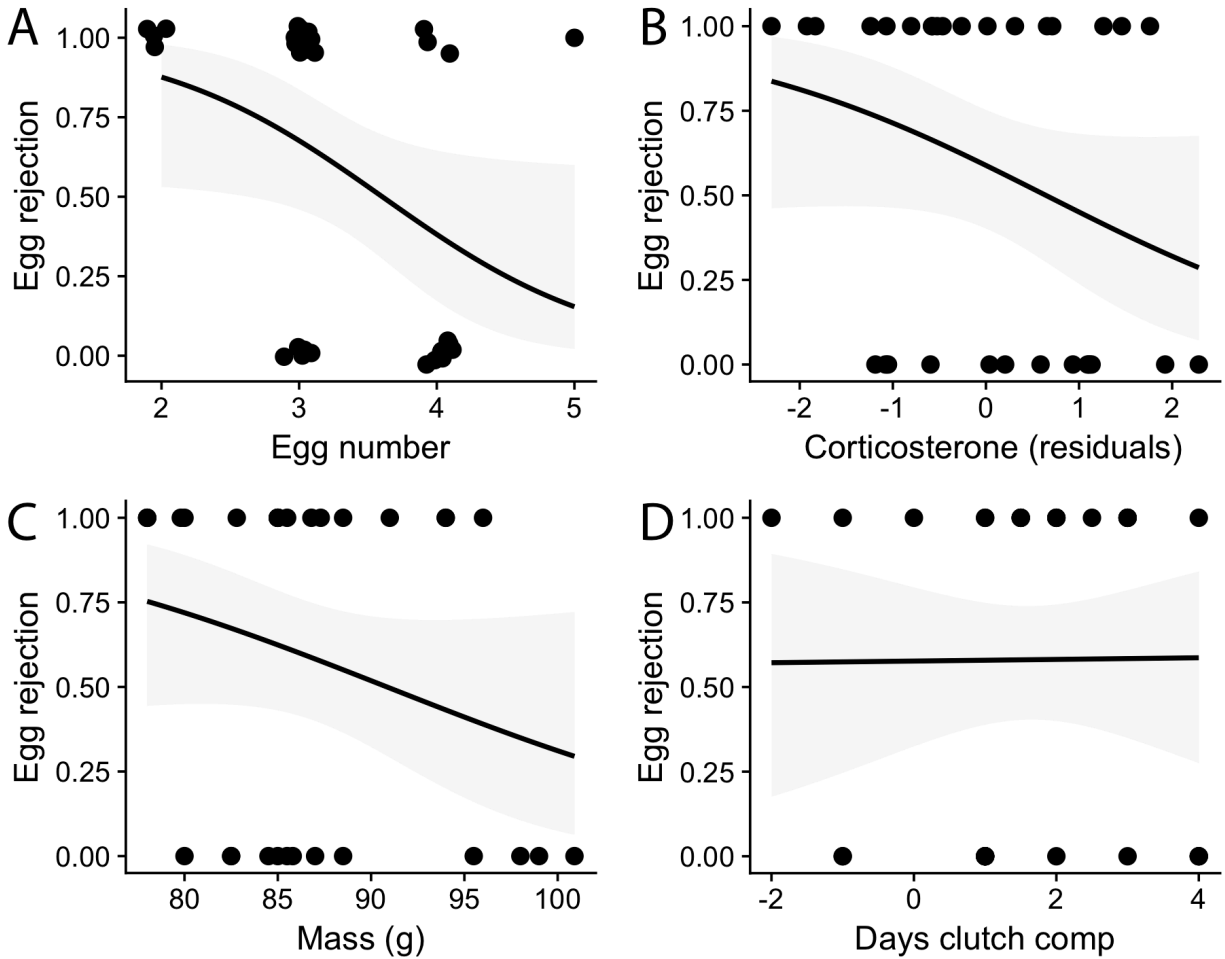

710  
711  
712  
713  
714  
715  
716  
717  
718

*Figure 2.* Relationship between the probability of egg rejection at day one (egg rejection) and (A) egg number at the time of parasitism, (B) baseline corticosterone levels (time-corrected residual levels), (C) mass, and (D) days between clutch completion and parasitism (“days clutch comp”). Grey shading indicates the 95% confidence intervals from the logistic regressions. Plots show relationship between raw data points. Data points at discrete x-values are jittered for visibility.

719 Table 1

720 *Generalized linear models predicting egg rejection at day 1 with AICc higher than the null*  
 721 *model. k = number of fixed terms in the model, AICc = Akaike information criterion,  $\Delta AICc$  =*  
 722 *delta AICc between the focal model and the best model,  $w_i$  = Akaike weights, p = probability that*  
 723 *the model explains more variation than the null model,  $r^2$  = McFadden's pseudo  $r^2$  of model fit.*  
 724 *Egg num: number of eggs at the time of parasitism; cort: baseline corticosterone adjusted for*  
 725 *bleeding time, days clutch comp: number of days elapsed between clutch completion and*  
 726 *parasitism, mass: female mass in g; age: second year or after second year age groups. Top*  
 727 *seven models with  $\Delta AICc < 2.0$  are in italic font.*

| <b>model</b>                                                      | <b>k</b> | <b>AICc</b> | <b><math>\Delta AICc</math></b> | <b><math>w_i</math></b> | <b>p</b> | <b><math>r^2</math></b> |
|-------------------------------------------------------------------|----------|-------------|---------------------------------|-------------------------|----------|-------------------------|
| <i>egg num</i>                                                    | 1        | 41.80       | 0.00                            | 0.11                    | 0.03     | 0.11                    |
| <i>egg num + cort + days clutch comp + mass</i>                   | 4        | 42.75       | 0.95                            | 0.07                    | 0.02     | 0.28                    |
| <i>egg num + cort</i>                                             | 2        | 42.93       | 1.13                            | 0.06                    | 0.05     | 0.15                    |
| <i>egg num + mass</i>                                             | 2        | 42.97       | 1.17                            | 0.06                    | 0.05     | 0.14                    |
| <i>egg num + days clutch com + mass</i>                           | 3        | 43.12       | 1.33                            | 0.05                    | 0.04     | 0.20                    |
| <i>egg num + days clutch comp</i>                                 | 2        | 43.52       | 1.73                            | 0.04                    | 0.06     | 0.13                    |
| <i>cort</i>                                                       | 1        | 43.72       | 1.93                            | 0.04                    | 0.09     | 0.07                    |
| egg num + cort + days clutch comp                                 | 3        | 43.92       | 2.12                            | 0.04                    | 0.05     | 0.18                    |
| egg num + date                                                    | 2        | 44.09       | 2.29                            | 0.03                    | 0.08     | 0.12                    |
| egg num+ age                                                      | 2        | 44.25       | 2.45                            | 0.03                    | 0.09     | 0.11                    |
| null model                                                        | 0        | 44.30       | 2.51                            | 0.03                    | NA       | NA                      |
| full model: egg num + cort + days clutch comp + date + mass + age | 6        | 49.06       | 7.27                            | 0                       | 0.06     | 0.28                    |

728

729

730 Table 2  
731 *GLM model predicting the probability of egg rejection at day 1, including all of the covariates*  
732 *present in the 7 top models; s.e. = standard error. Significant variables and p-values are*  
733 *italicized.*

| <b>covariate</b>             | <b>estimate</b> | <b>s.e.</b> | <b>z</b>     | <b>p</b>    |
|------------------------------|-----------------|-------------|--------------|-------------|
| (Intercept)                  | 0.61            | 0.48        | 1.25         | 0.21        |
| <i>egg number</i>            | <i>-1.18</i>    | <i>0.56</i> | <i>-2.11</i> | <i>0.04</i> |
| mass                         | -1.12           | 0.64        | -1.76        | 0.08        |
| corticosterone               | -0.86           | 0.53        | -1.62        | 0.11        |
| days since clutch completion | -1.22           | 0.64        | -1.92        | 0.06        |

734  
735

736 Table 3  
737 *Averaged parameter estimates and the importance of covariates in explaining the probability of*  
738 *egg rejection on day 1; s.e. = adjusted standard errors, importance = sum of Akaike weights in*  
739 *all models that include the variable; CI = confidence interval.*

| <b>covariate</b>             | <b>estimate (95% CIs)</b> | <b>s.e.</b> | <b>z</b> | <b>importance</b> |
|------------------------------|---------------------------|-------------|----------|-------------------|
| (Intercept)                  | 0.42 (-0.47, 1.31)        | 0.45        | 0.93     | NA                |
| egg number                   | -0.96 (-2.04, 0.11)       | 0.55        | 1.76     | 0.72              |
| mass                         | -0.79 (-2.04, 0.46)       | 0.64        | 1.24     | 0.46              |
| corticosterone               | -0.60 (-1.53, 0.32)       | 0.47        | 1.27     | 0.44              |
| days since clutch completion | -0.73 (-2.01, 0.55)       | 0.65        | 1.12     | 0.37              |
| date                         | -0.09 (-1.36, 1.18)       | 0.65        | 0.14     | 0.21              |
| age (older)                  | -0.17 (-2.06, 1.73)       | 0.97        | 0.17     | 0.18              |

740
