# Supplementary material for: Proximate Predictors of Variation in Egg Rejection Behavior by Hosts of Avian Brood Parasites
Source: bioRxiv or medRxiv preprint supplement (doi:10.1101/788505), 2019-10-01

*Supplementary material for:*

Proximate Predictors of Variation in Egg Rejection Behavior by Hosts of Avian Brood Parasites

Mikus Abolins-Abols\* and Mark E. Hauber

*Department of Evolution, Ecology, and Behavior, School of Integrative Biology, University of Illinois, Urbana-Champaign, IL 61801, USA.*

*\*Corresponding author; email: m.abolins.abols@gmail.com*

**Figure S1.** The relationship between the blood collection start time (in seconds from the moment of capture) and corticosterone levels (ng/mL). Blue line indicates linear model fit, and the shaded grey area indicates 95% confidence interval for the line.

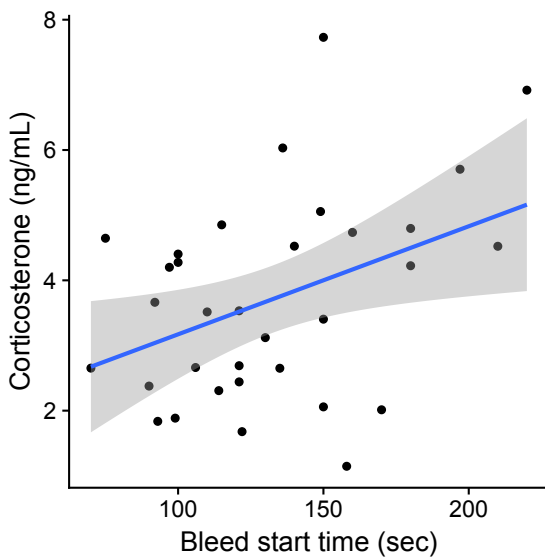

Supplement: Supplementary file [file media-1.pdf]
